# Supplementary material for: A Disposable Carbon-Based Electrochemical Cell Modified with Carbon Black and Ag/δ-FeOOH for Non-Enzymatic H2O2 Electrochemical Sensing
Source: MDPI journal article supplement (doi:10.3390/electrochem4040033), 2023-11-14
Supplement: s1 [file s1]

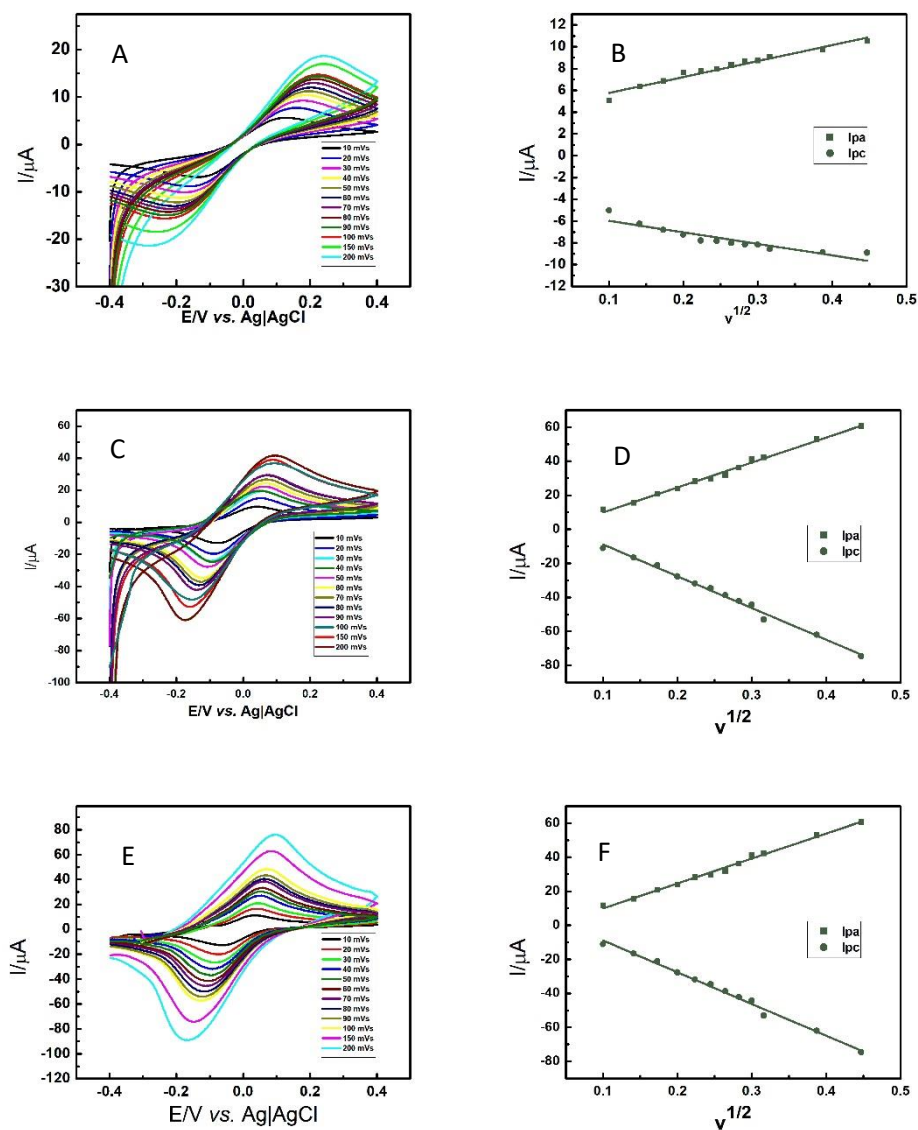

**Figure S1.** Cyclic voltammograms resulting from increasing scan rate (10–200  $\text{mV s}^{-1}$ ) and plot peak current versus square root of the scan rate at DCell (A,B) and DCell modified with  $\text{Ag}/\delta\text{-FeOOH}$  (C,D) and DCell modified with  $\text{CB}/\text{Ag}/\delta\text{-FeOOH}$  (E,F) in 1 mM of  $\text{K}_3\text{Fe}(\text{CN})_6$  and 1 mM of  $\text{K}_4\text{Fe}(\text{CN})_6$  in 0.1 M KCl pH 3.2.

**Table S1.** LOD values for other modified electrodes for H<sub>2</sub>O<sub>2</sub> detection

| Sample                                           | LOD          | Reference   |
|--------------------------------------------------|--------------|-------------|
| Ag/ $\delta$ -FeOOH                              | 71 $\mu$ M   | [1]         |
| CFP/ $\alpha$ -FeOOH                             | 18 $\mu$ M   | [2]         |
| PPy/CB/ $\alpha$ -Fe <sub>2</sub> O <sub>3</sub> | 52.8 nM      | [3]         |
| Fe <sub>3</sub> O <sub>4</sub> – BCAMW           | 503 $\mu$ M  | [4]         |
| Fe <sub>3</sub> O <sub>4</sub> /Gr/CC            | 4.79 $\mu$ M | [5]         |
| CB//Ag/ $\delta$ -FeOOH                          | 21.6 $\mu$ M | (This work) |

LOD = detection limit; LOQ = quantification limit.

## References

1. de Meira, F.H.A.; Resende, S.F.; Monteiro, D.S.; Pereira, M.C.; Mattoso, L.H.C.; Faria, R.C.; Afonso, A.S. A Non-enzymatic Ag/ $\delta$ -FeOOH Sensor for Hydrogen Peroxide Determination using Disposable Carbon-based Electrochemical Cells. *Electroanalysis* **2020**, *32*, 2231–2236, doi:10.1002/elan.202060171.
2. Du, S.C.; Ren, Z.Y.; Wu, J.; Xi, W.; Fu, H.G. Vertical  $\alpha$ -FeOOH nanowires grown on the carbon fiber paper as a free-standing electrode for sensitive H<sub>2</sub>O<sub>2</sub> detection. *Nano Res.* **2016**, *9*, 2260–2269, doi:10.1007/s12274-016-1113-y.
3. Ahmed, J.; Faisal, M.; Jalalah, M.; Alsaiari, M.; Alsareii, S.A.; Harraz, F.A. An efficient amperometric catechol sensor based on novel polypyrrole-carbon black doped  $\alpha$ -Fe<sub>2</sub>O<sub>3</sub> nanocomposite. *Colloid Surf. A-Physicochem. Eng. Asp.* **2021**, *619*, 12, doi:10.1016/j.colsurfa.2021.126469.
4. Ates, A.; Oskay, K.O. Preparation and characterization of nanosized Fe<sub>3</sub>O<sub>4</sub>-biochar electrocatalysts with large surface area for H<sub>2</sub>O<sub>2</sub> sensing. *Surf. Interfaces* **2022**, *29*, 14, doi:10.1016/j.surfin.2022.101733.
5. Sobahi, N.; Imran, M.; Khan, M.E.; Mohammad, A.; Alam, M.M.; Yoon, T.; Mehedi, I.M.; Hussain, M.A.; Abdulaal, M.J.; Jiman, A.A. Electrochemical Sensing of H<sub>2</sub>O<sub>2</sub> by Employing a Flexible Fe<sub>3</sub>O<sub>4</sub>/Graphene/Carbon Cloth as Working Electrode. *Materials* **2023**, *16*, 18, doi:10.3390/ma16072770.
